# Supplementary material
Source: PubMed Central journal article supplement (PMC9713441)

**A**

## Developmental lethality

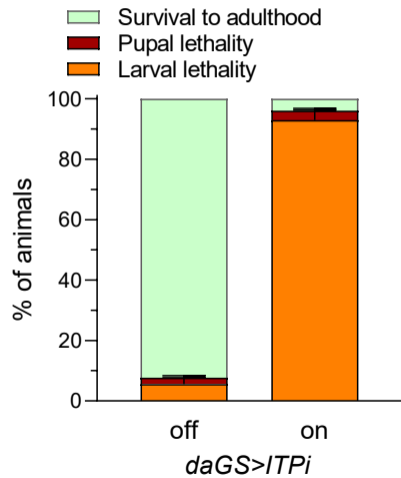**B**

## Developmental timing

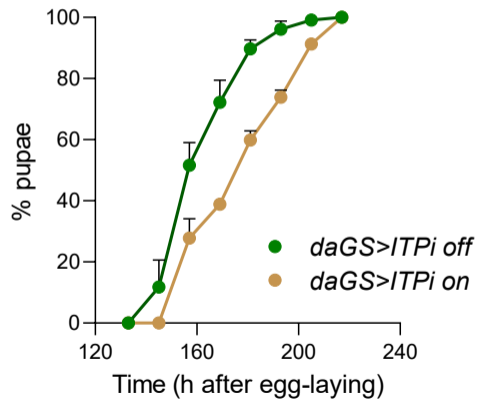**C**

## Body size

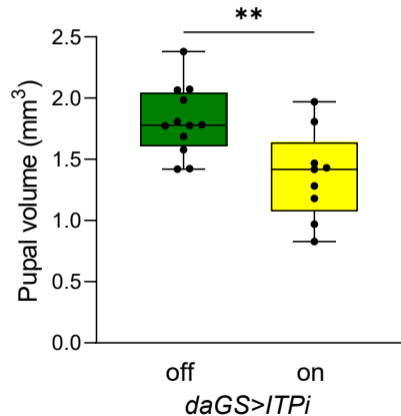

Supplement: iyac150_supplementary_figure_s1.pdf [file iyac150_supplementary_figure_s1.pdf]

**A**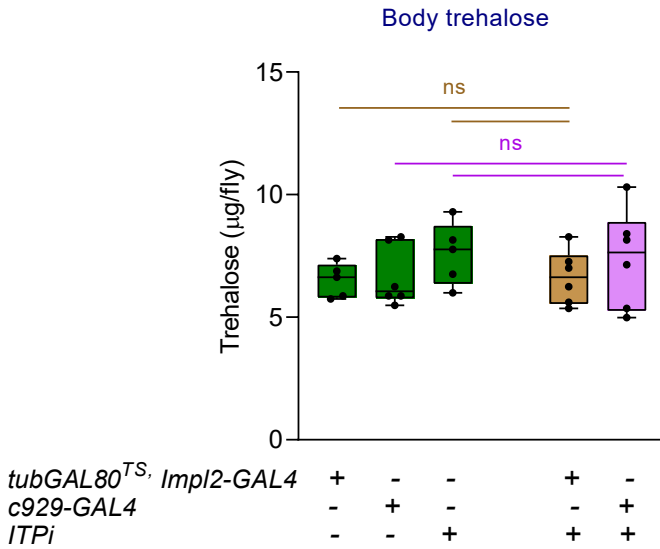**B**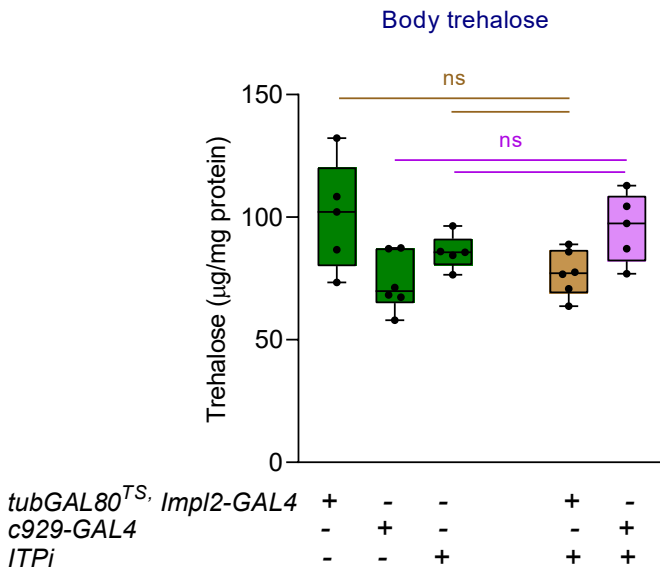

Supplement: iyac150_supplementary_figure_s10.pdf [file iyac150_supplementary_figure_s10.pdf]

## Startle-induced climbing

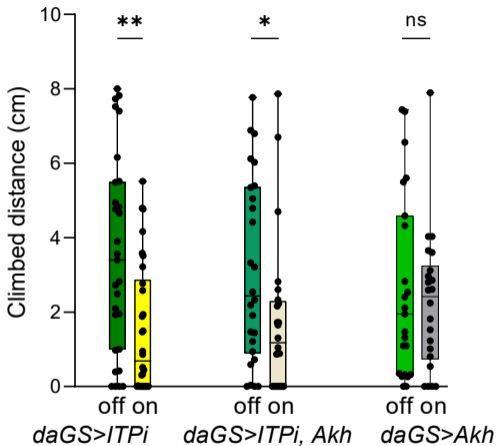

Supplement: iyac150_supplementary_figure_s11.pdf [file iyac150_supplementary_figure_s11.pdf]

**A**

Lifespan, females

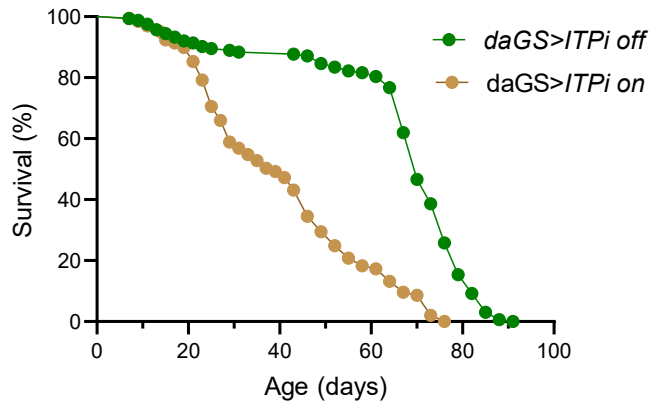**B**

Lifespan, males

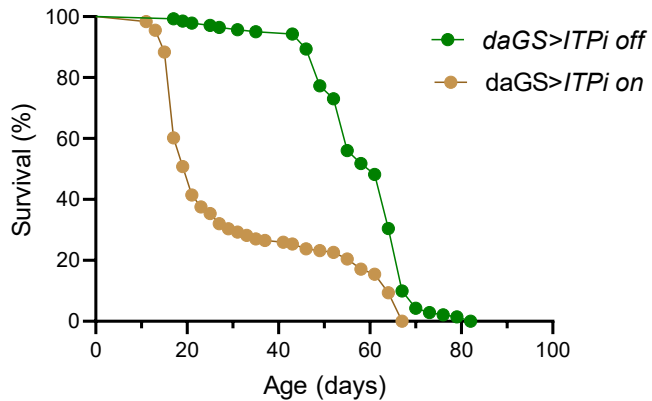

Supplement: iyac150_supplementary_figure_s2.pdf [file iyac150_supplementary_figure_s2.pdf]

## Weight

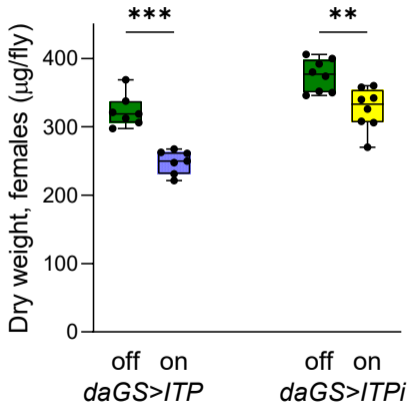

Supplement: iyac150_supplementary_figure_s3.pdf [file iyac150_supplementary_figure_s3.pdf]

**A**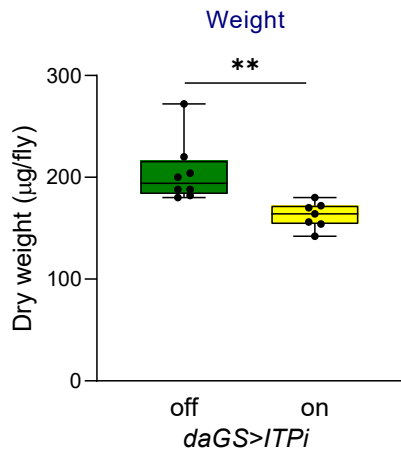**B**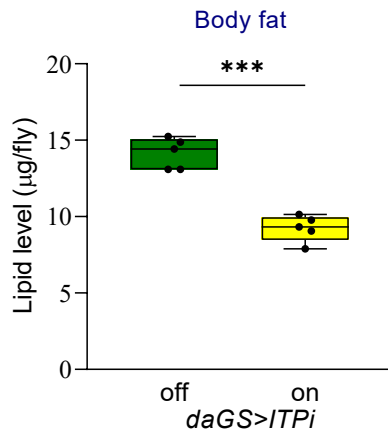**C**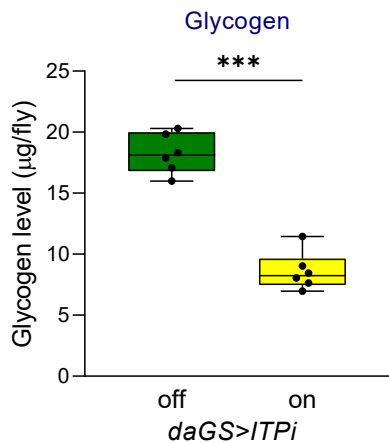**D**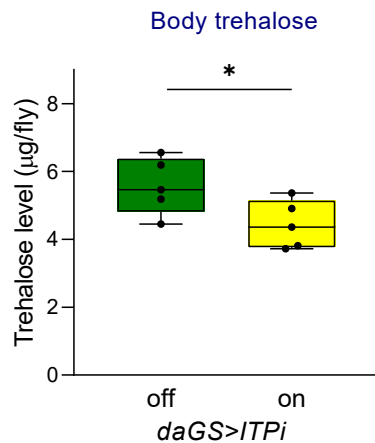

Supplement: iyac150_supplementary_figure_s4.pdf [file iyac150_supplementary_figure_s4.pdf]

**A***Tps1*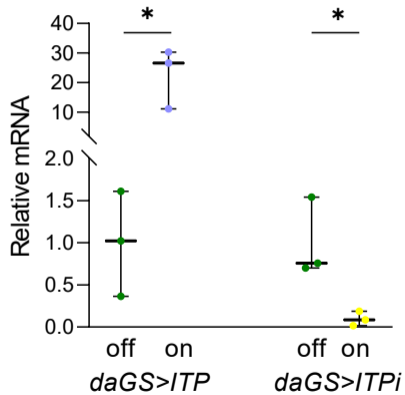**B***cTreh*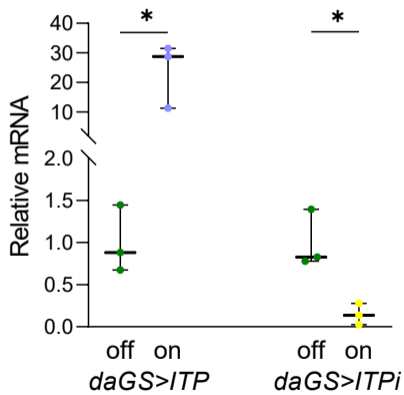

Supplement: iyac150_supplementary_figure_s5.pdf [file iyac150_supplementary_figure_s5.pdf]

## Sugars in circulation

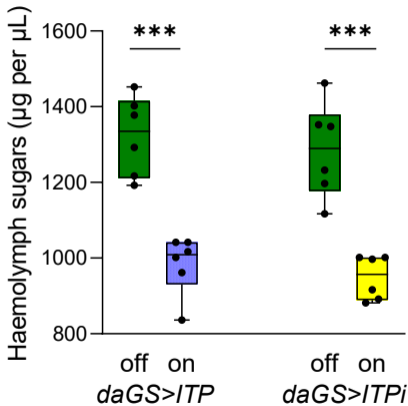

Supplement: iyac150_supplementary_figure_s6.pdf [file iyac150_supplementary_figure_s6.pdf]

**A**

Metabolic rate (line VDRC#330029)

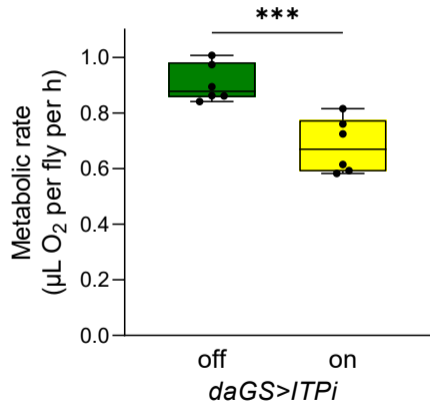**B**

Metabolic rate (line VDRC #43848)

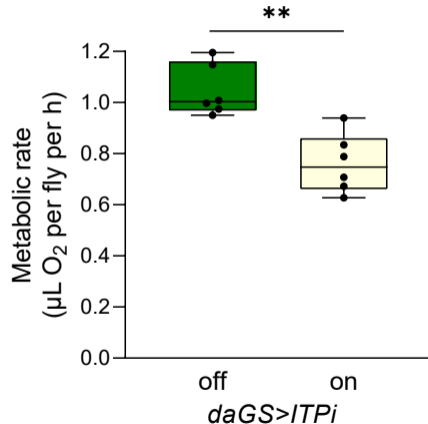

Supplement: iyac150_supplementary_figure_s7.pdf [file iyac150_supplementary_figure_s7.pdf]

## Metabolic rate

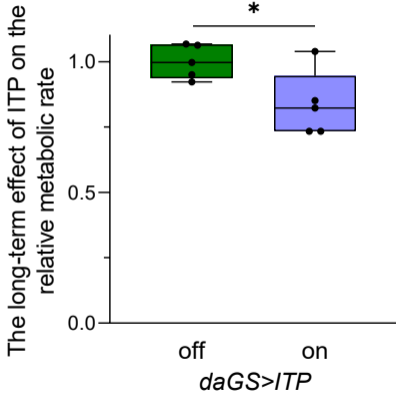

Supplement: iyac150_supplementary_figure_s8.pdf [file iyac150_supplementary_figure_s8.pdf]

**A***Akh*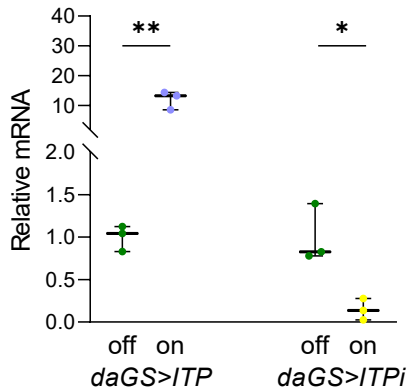**B***AkhR*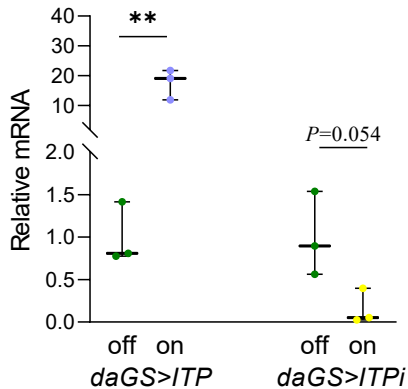

Supplement: iyac150_supplementary_figure_s9.pdf [file iyac150_supplementary_figure_s9.pdf]
